# Supplementary material for: Anti‐inflammatory properties of lemon‐derived extracellular vesicles are achieved through the inhibition of ERK/NF‐κB signalling pathways
Source: PubMed Central journal article supplement (PMC9344827; doi:10.1111/jcmm.17404), 2022-07-04
Supplement: JCMM-26-4195-s001.pdf [file JCMM-26-4195-s001.pdf]

## Supplementary Material

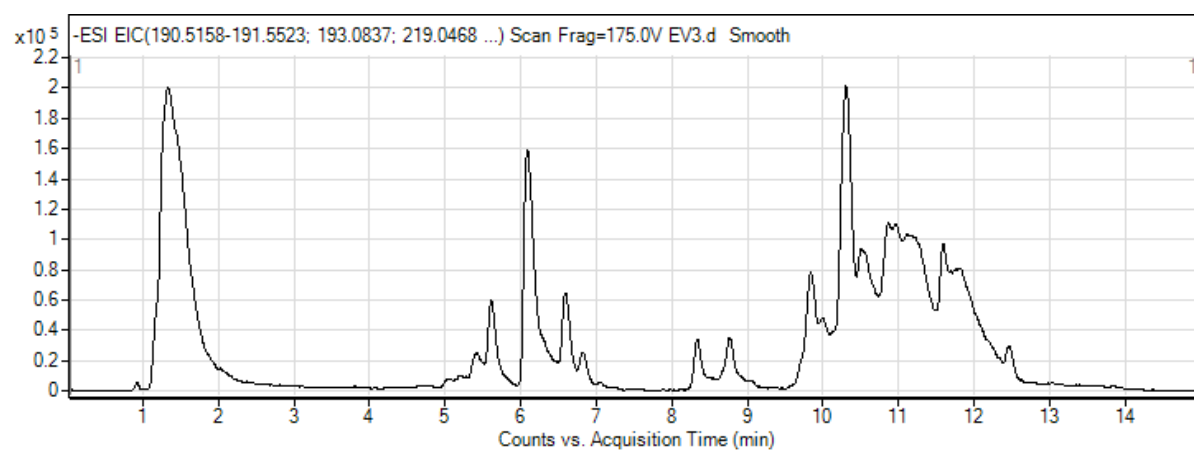

**Supplementary Figure S1.** Representative HPLC/ESI/QTOF trace of lemon-derived extracellular vesicles (negative ion mode).

|    | <b>Compound</b>         | <b>Molecular formula</b>                        | <b>Chemical class</b>      | <b>ESI<sup>-</sup> [M-H]<sup>-</sup> (m/z) (Teor.)</b> | <b>ESI<sup>-</sup> [M-H]<sup>-</sup> (m/z) (Exp.)</b> | <b>Rt (min)</b> |
|----|-------------------------|-------------------------------------------------|----------------------------|--------------------------------------------------------|-------------------------------------------------------|-----------------|
| 1  | Disaccharide            | C <sub>12</sub> H <sub>22</sub> O <sub>11</sub> | Carbohydrate               | 341.1089                                               | 341.1025                                              | 1.03            |
| 2  | Quinic acid             | C <sub>7</sub> H <sub>12</sub> O <sub>6</sub>   | Organic acid               | 191.0561                                               | 191.0523                                              | 1.05            |
| 3  | isocitric Acid          | C <sub>6</sub> H <sub>8</sub> O <sub>7</sub>    | Organic acid               | 191.0197                                               | 191.0158                                              | 1.19            |
| 4  | Citric Acid             | C <sub>6</sub> H <sub>8</sub> O <sub>7</sub>    | Organic acid               | 191.0197                                               | 191.0158                                              | 1.51            |
| 5  | (R)-(Homo)2-citrate     | C <sub>8</sub> H <sub>12</sub> O <sub>7</sub>   | Organic acid               | 219.0510                                               | 219.0468                                              | 3.11            |
| 6  | Eriodictyol diglucoside | C <sub>27</sub> H <sub>32</sub> O <sub>16</sub> | Non-methoxylated flavonoid | 611.1618                                               | 611.1541                                              | 4.51            |
| 7  | Quercetin-Glu-Rha-Glu   | C <sub>33</sub> H <sub>40</sub> O <sub>21</sub> | Non-methoxylated flavonoid | 771.1989                                               | 771.1901                                              | 4.61            |
| 8  | Coumaric acid glucoside | C <sub>15</sub> H <sub>18</sub> O <sub>8</sub>  | Phenolic acid derivative   | 325.0929                                               | 325.0871                                              | 4.63            |
| 9  | Rutin                   | C <sub>27</sub> H <sub>30</sub> O <sub>16</sub> | Non-methoxylated flavonoid | 609.1461                                               | 609.1385                                              | 4.73            |
| 10 | Feruloylglucose         | C <sub>16</sub> H <sub>20</sub> O <sub>9</sub>  | Cinnamic acid derivative   | 355.1035                                               | 355.0979                                              | 4.84            |
| 11 | Sinapoylglucose         | C <sub>17</sub> H <sub>22</sub> O <sub>10</sub> | Cinnamic acid derivative   | 385.1140                                               | 385.1087                                              | 4.89            |

|    |                                  |                      |                            |          |          |      |
|----|----------------------------------|----------------------|----------------------------|----------|----------|------|
| 12 | Vicenin 2                        | $C_{27}H_{30}O_{15}$ | Non-methoxylated flavonoid | 593.1512 | 593.1446 | 4.95 |
| 13 | Eriodictyol-Glu-Rha-Glu          | $C_{33}H_{42}O_{20}$ | Non-methoxylated flavonoid | 757.2197 | 757.2101 | 5.03 |
| 14 | Diosmetin diglucoside            | $C_{28}H_{32}O_{16}$ | Methoxylated flavonoid     | 623.1618 | 623.1551 | 5.11 |
| 15 | Neohesperidin                    | $C_{27}H_{30}O_{16}$ | Methoxylated flavonoid     | 609.1461 | 609.1384 | 5.50 |
| 16 | Eriocitrin                       | $C_{27}H_{32}O_{15}$ | Non-methoxylated flavonoid | 595.1668 | 595.1610 | 5.55 |
| 17 | Luteolin rutinoside              | $C_{27}H_{30}O_{15}$ | Non-methoxylated flavonoid | 593.1512 | 593.1432 | 5.61 |
| 18 | Limonin-17- $\beta$ -D-glucoside | $C_{32}H_{42}O_{14}$ | Limonoid                   | 649.2502 | 649.2433 | 5.68 |
| 19 | Diosmetin-glucoside              | $C_{22}H_{22}O_{11}$ | Methoxylated flavonoid     | 461.1089 | 461.1036 | 5.79 |
| 20 | Isorhamnetin-neohesperoside      | $C_{28}H_{32}O_{16}$ | Methoxylated flavonoid     | 623.1618 | 623.1551 | 5.88 |
| 21 | Naringin                         | $C_{27}H_{32}O_{14}$ | Non-methoxylated           | 579.1719 | 579.1657 | 5.90 |

## Supplementary Material

|    |                                                                     |                                |                           |                                  |                                  |      |
|----|---------------------------------------------------------------------|--------------------------------|---------------------------|----------------------------------|----------------------------------|------|
|    |                                                                     |                                | flavonoid                 |                                  |                                  |      |
| 22 | Chlorophyll c                                                       | $C_{35}H_{30}N_4O_5$           | Pigment                   | 585.2143                         | 585.2126                         | 5.96 |
| 23 | Diosmin                                                             | $C_{28}H_{32}O_{15}$           | Methoxylated<br>flavonoid | 607.1668                         | 607.1605                         | 6.02 |
| 24 | Hesperidin                                                          | $C_{28}H_{34}O_{15}$           | Methoxylated<br>flavonoid | 609.1825                         | 609.1763                         | 6.12 |
| 25 | Nomilinic acid-17- $\beta$ -D-glucoside                             | $C_{34}H_{48}O_{16}$           | Limonoid                  | 711.2870                         | 711.2806                         | 6.35 |
| 26 | Nomilinic acid- $\beta$ -glucopyranoside                            | $C_{34}H_{46}O_{15}$           | Limonoid                  | 693.2764                         | 693.2689                         | 6.39 |
| 27 | Obacunone glucoside                                                 | $C_{32}H_{42}O_{13}$           | Limonoid                  | 633.2553                         | 633.2484                         | 6.60 |
| 28 | Methoxyeugenol                                                      | $C_{11}H_{14}O_3$              | Methoxyphenols            | 193.0870                         | 193.0837                         | 6.78 |
| 29 | Palmitoyl-CoA<br>(ammonium salt)                                    | $C_{37}H_{75}N_{10}O_{17}P_3S$ | Acyl-thioester            | 1055.4172                        | 1055.4299                        | 8.00 |
| 30 | Myristoyl-myristoleyl-sn-glycero-3-diphosphocytidine potassium salt | $C_{40}H_{71}KN_3O_{15}P_2$    | Nucleotide<br>derivative  | 915.3819<br>(M-H <sub>2</sub> O) | 915.3611<br>(M-H <sub>2</sub> O) | 8.16 |
| 31 | 1,2-Dimyristoyl-sn-glycero-3-diphosphocytidine potassium salt       | $C_{40}H_{73}KN_3O_{15}P_2$    | Nucleotide<br>derivative  | 935.4081                         | 935.3895                         | 8.38 |
| 32 | Limonin                                                             | $C_{26}H_{30}O_8$              | Limonoid                  | 515.1923                         | 515.1855                         | 8.57 |

|    |                     |                                                   |                  | (M+FA-H)             | (M+FA-H)             |       |
|----|---------------------|---------------------------------------------------|------------------|----------------------|----------------------|-------|
| 33 | LysoPI(8:3)         | C <sub>27</sub> H <sub>47</sub> O <sub>12</sub> P | Lysophospholipid | 593.2732             | 593.2662             | 9.36  |
| 34 | lysoPE(18:3)        | C <sub>23</sub> H <sub>42</sub> NO <sub>7</sub> P | Lysophospholipid | 474.2626             | 474.2565             | 9.48  |
| 35 | lysoPC(18:3)        | C <sub>26</sub> H <sub>48</sub> NO <sub>7</sub> P | Lysophospholipid | 562.3150<br>(M+FA-H) | 562.3076<br>(M+FA-H) | 9.55  |
| 36 | lysoPE(18:3) isomer | C <sub>23</sub> H <sub>42</sub> NO <sub>7</sub> P | Lysophospholipid | 474.2626             | 474.2568             | 9.61  |
| 37 | lysoPC(18:3) isomer | C <sub>26</sub> H <sub>48</sub> NO <sub>7</sub> P | Lysophospholipid | 562.3150<br>(M+FA-H) | 562.3076<br>(M+FA-H) | 9.70  |
| 38 | lysoPS(18:2)        | C <sub>24</sub> H <sub>44</sub> NO <sub>9</sub> P | Lysophospholipid | 520.2681             | 520.2608             | 9.92  |
| 39 | lysoPE(18:2)        | C <sub>23</sub> H <sub>44</sub> NO <sub>7</sub> P | Lysophospholipid | 476.2783             | 476.2720             | 9.96  |
| 40 | lysoPC(18:2)        | C <sub>26</sub> H <sub>50</sub> NO <sub>7</sub> P | Lysophospholipid | 564.3307<br>(M+FA-H) | 564.3228<br>(M+FA-H) | 10.06 |
| 41 | lysoPE(18:2) isomer | C <sub>23</sub> H <sub>44</sub> NO <sub>7</sub> P | Lysophospholipid | 476.2783             | 476.2725             | 10.11 |
| 42 | lysoPC(18:2) isomer | C <sub>26</sub> H <sub>50</sub> NO <sub>7</sub> P | Lysophospholipid | 564.3307<br>(M+FA-H) | 564.3232<br>(M+FA-H) | 10.22 |
| 43 | lysoPE(16:0)        | C <sub>21</sub> H <sub>44</sub> NO <sub>7</sub> P | Lysophospholipid | 452.2783             | 452.2729             | 10.52 |
| 44 | lysoPI(16:0)        | C <sub>25</sub> H <sub>49</sub> O <sub>12</sub> P | Lysophospholipid | 571.2889             | 571.2824             | 10.56 |
| 45 | lysoPC(16:0)        | C <sub>24</sub> H <sub>50</sub> NO <sub>7</sub> P | Lysophospholipid | 540.3307<br>(M+FA-H) | 540.3246<br>(M+FA-H) | 10.67 |

**Supplementary Table 1.** Composition of lemon-derived extracellular vesicles (LEVs).

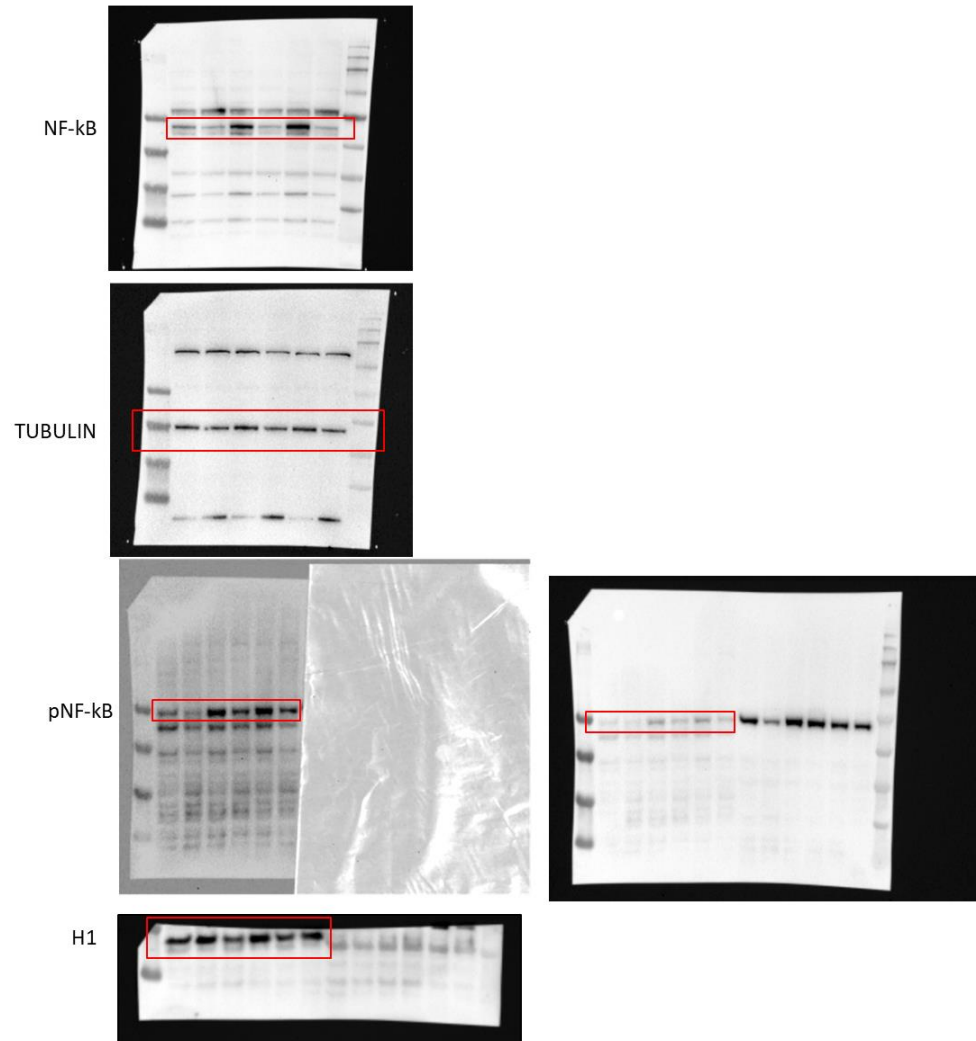

**Supplementary Figure S2.** Un-cropped blots of figure 4B

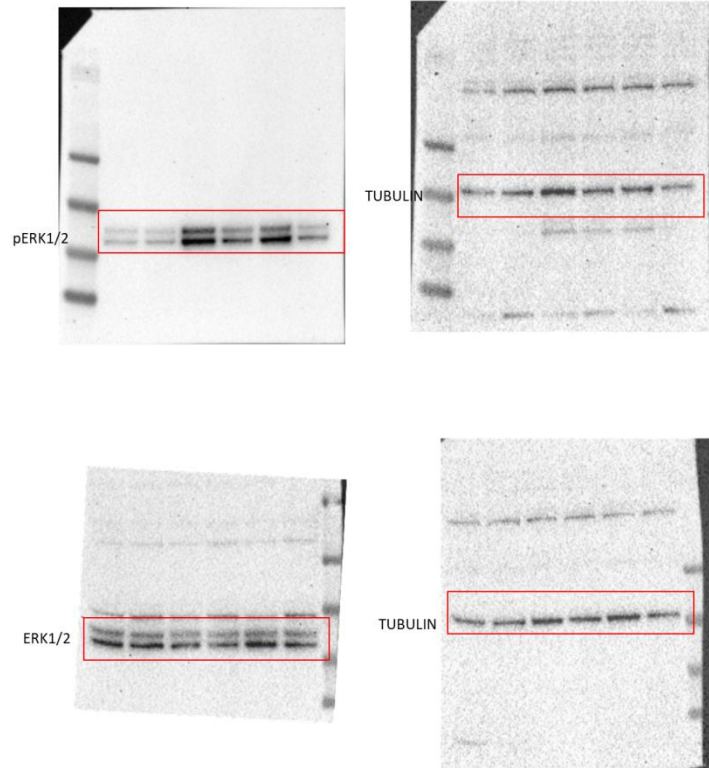

**Supplementary Figure S3.** Un-cropped blots of figure 4C
